# Supplementary material
Source: PubMed Central journal article supplement (PMC5196883)
Supplement: thnov07p0031s1.pdf [file thnov07p0031s1.pdf]

## Supporting Information

# **From Interface to Solution: Integrating Immunoassay with Netlike Rolling Circle Amplification for Ultrasensitive Detection of Tumor Biomarker**

Chang Feng<sup>a,#</sup>, Bing Bo<sup>b,#</sup>, Xiaoxia Mao<sup>a</sup>, Hai Shi<sup>a</sup>, Xiaoli Zhu<sup>a,c,\*</sup>, Genxi Li<sup>a,c,\*</sup>

<sup>a</sup> Center for Molecular Recognition and Biosensing, School of Life Sciences, Shanghai University, Shanghai 200444, P. R. China

<sup>b</sup> Department of Medical Oncology, Shanghai Pulmonary Hospital, Tongji University School of Medicine, Shanghai 200433, P. R. China

<sup>c</sup> State Key Laboratory of Pharmaceutical Biotechnology and Collaborative Innovation Center of Chemistry for Life Sciences, Department of Biochemistry, Nanjing University, Nanjing 210093, P. R. China

# These authors contributed equally to this work.

---

\*Corresponding authors. E-mail addresses: xiaolizhu@shu.edu.cn (X. Zhu), genxili@nju.edu.cn (G. Li). Fax: +86 21 66137541 (X. Zhu), +86 25 83592510 (G. Li).

**Table S1.** Sequences of oligonucleotides. The underlined sequences are the recognition sites of Nb. BsrDI nicking enzyme. This enzyme can nick on their complementary sequences (5'-CATTGC(nick)N-3').

| Oligonucleotides          | Sequence (5'-3')                                                                                                        |
|---------------------------|-------------------------------------------------------------------------------------------------------------------------|
| Circular Probe-1<br>(C-1) | CAC GCG ATC CGC ATG TGG AAA ATC TCT AGC<br>AGT CCC ACC CTC CAA CCA CCA AGG <u>CAA TGT</u><br>ACA CGA ATT CGC CGA ACG    |
| Circular Probe-2<br>(C-2) | GTA TGA GTA TCT CCT ATC TTA ACC CAC GCC<br>GAA TCC TAG ACT ATA TAT GAT GGT TAT GCT ATG<br><u>GCA ATG</u> ATC CCG CTG AT |
| Primer 1-1 (P1-1)         | Biotin-ACT GCT AGA GAT TTT CCA CAT                                                                                      |
| Primer 1-2 (P1-2)         | Biotin-CTA GGA TTC GGC GTG GGT TAA                                                                                      |
| Primer 2-1 (P2-1)         | ACC AAG <u>GCA ATG</u> TAC ACG AAT TC                                                                                   |
| Primer 2-2 (P2-2)         | GCT ATG <u>GCA ATG</u> ATC CCG CTG AT                                                                                   |

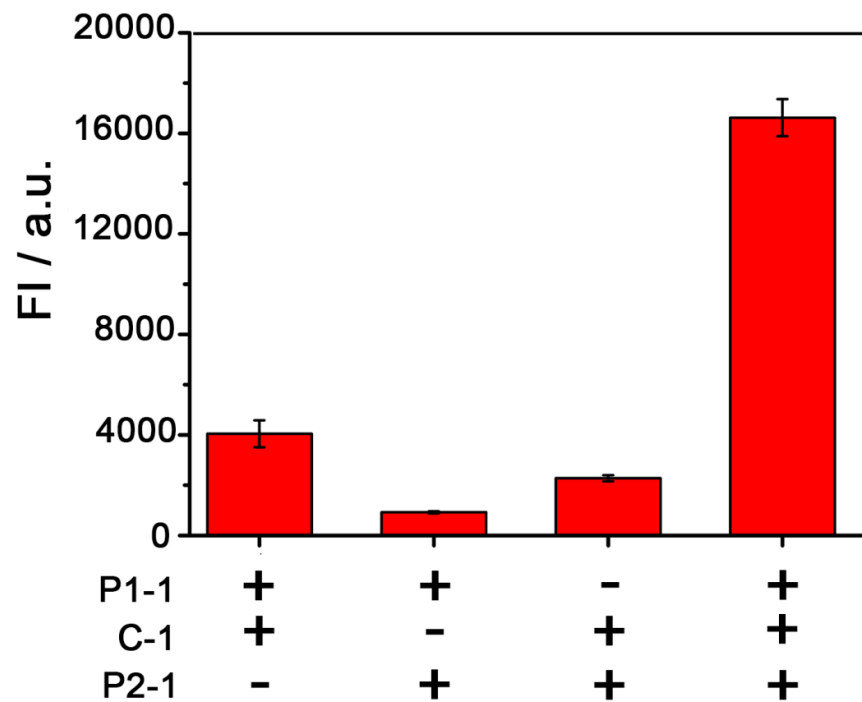

**Figure S1.** Fluorescent signals of immuno-NRCA in presence of the three oligonucleotides or in absence of any of them.

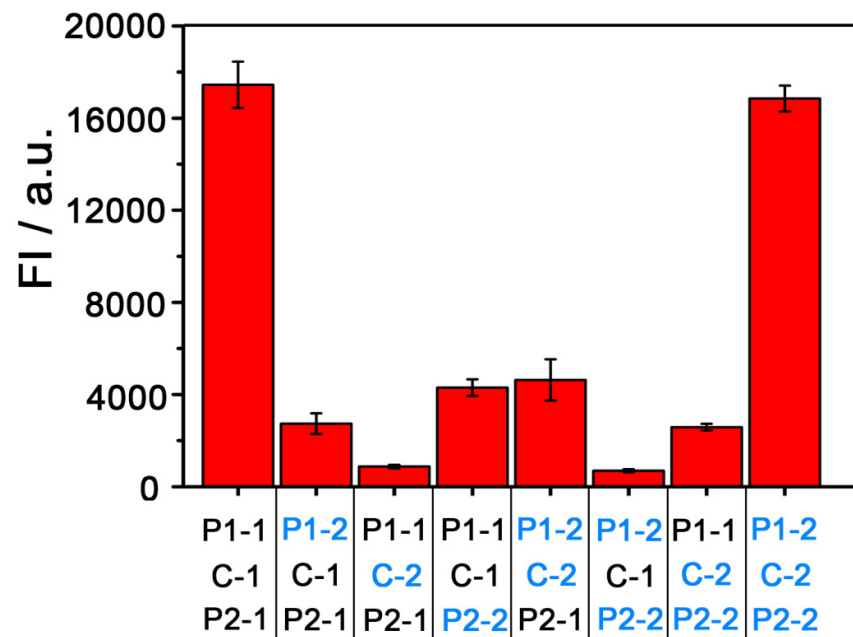

**Figure S2.** Fluorescent signals of immuno-NRCA in presence of different oligonucleotides sets, i.e. P1-1, C-1, P2-1 (black fonts), and P1-2, C-2, P2-2 (blue fonts), and the mashup of them.

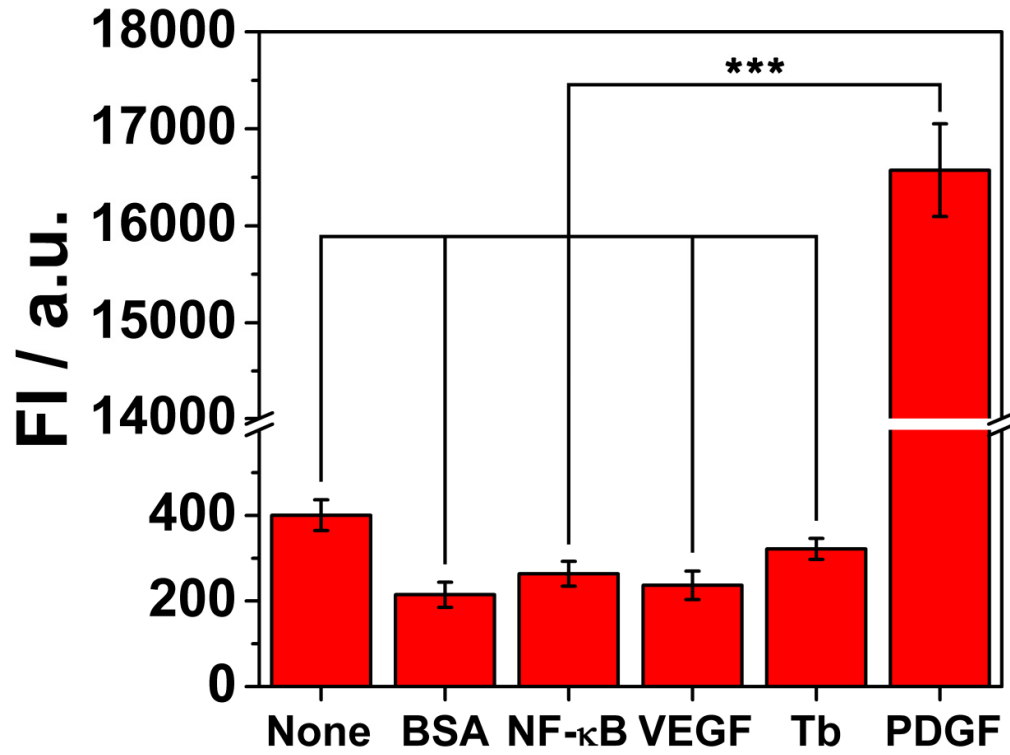

**Figure S3.** Detection specificity of the immuno-NRCA assay for PDGF. (BSA: bovine serum albumin, NF-κB: nuclear factor kappa-B, VEGF: vascular endothelial growth factor, Tb: thrombin).

**Table S2.** Detection of PDGF in real serum samples using ELISA and immuno-NRCA, respectively. The values before the slash are the measured values of diluted sera (absorbance for ELISA, and fluorescent intensity for immuno-NRCA). The values after the slash are the calculated values of the concentrations of PDGF using the standard curves (referred to Fig. 4C for ELISA, and Fig. 4B for immuno-NRCA). The relative deviation is calculated using an equation as follows:  $(RD = (C_{immuno-NRCA} - C_{ELISA}) / C_{ELISA})$  ( $RD$ : relative deviation,  $C_{immuno-NRCA}$ : concentration obtained using immuno-NRCA,  $C_{ELISA}$ : concentration obtained using ELISA).

| <b>Cancer group</b> |                                             |                                                   |                           |
|---------------------|---------------------------------------------|---------------------------------------------------|---------------------------|
| <b>No.</b>          | <b>ELISA<br/>(O.D. / ng·L<sup>-1</sup>)</b> | <b>immuno-NRCA<br/>(a.u. / ng·L<sup>-1</sup>)</b> | <b>relative deviation</b> |
| 1                   | 1.43/342.9                                  | 4399/334.2                                        | -2.5%                     |
| 2                   | 0.41/43.2                                   | 3073/64.9                                         | 50.2%                     |
| 3                   | 0.95/222.6                                  | 4115/235.3                                        | 5.7%                      |
| 4                   | 1.21/287.1                                  | 4320/303.1                                        | 5.6%                      |
| 5                   | 0.98/229.2                                  | 4205/263.0                                        | 14.7%                     |
| 6                   | 1.57/376.8                                  | 4520/388.1                                        | 3.0%                      |
| 7                   | 0.79/91.2                                   | 3545/116.3                                        | 27.5%                     |
| 8                   | 1.39/165.9                                  | 4006/205.6                                        | 23.9%                     |
| 9                   | 1.65/397.5                                  | 4545/400.3                                        | 0.7%                      |
| 10                  | 0.83/96.3                                   | 3588/122.7                                        | 27.4%                     |
| 11                  | 0.51/56.7                                   | 3140/70.5                                         | 24.4%                     |
| 12                  | 1.31/312.9                                  | 4384/328.1                                        | 4.9%                      |
| 13                  | 1.55/373.5                                  | 4491/374.5                                        | 0.3%                      |
| 14                  | 1.56/187.2                                  | 4093/229.0                                        | 22.3%                     |
| 15                  | 1.03/243                                    | 4283/289.6                                        | 19.2%                     |

|    |            |            |        |
|----|------------|------------|--------|
| 16 | 1.10/129.6 | 3932/187.7 | 44.8%  |
| 17 | 0.98/114.6 | 3869/173.6 | 51.5%  |
| 18 | 0.74/84.9  | 3549/116.9 | 37.7%  |
| 19 | 0.49/53.4  | 2964/56.7  | 6.2%   |
| 20 | 0.37/39.2  | 2170/21.3  | -45.8% |

**Therapy group**

| No. | ELISA<br>(O.D. / ng·L <sup>-1</sup> ) | immuno-NRCA<br>(a.u. / ng·L <sup>-1</sup> ) | relative deviation |
|-----|---------------------------------------|---------------------------------------------|--------------------|
| 1   | 0.98/229.2                            | 4067/221.7                                  | -3.3%              |
| 2   | 0.27/26.4                             | 2936/54.8                                   | 107.6%             |
| 3   | 1.36/162.6                            | 3847/168.9                                  | 3.9%               |
| 4   | 0.80/93                               | 3475/106.7                                  | 14.7%              |
| 5   | 0.29/29.2                             | 2040/18.1                                   | -38.0%             |
| 6   | 0.89/206.7                            | 4143/243.6                                  | 17.8%              |
| 7   | 1.56/187.2                            | 3761/151.9                                  | -18.9%             |
| 8   | 1.16/274.5                            | 4126/238.5                                  | -13.1%             |
| 9   | 0.74/84.9                             | 3096/66.8                                   | -21.3%             |
| 10  | 1.10/129.6                            | 3519/112.6                                  | -13.1%             |
| 11  | 1.17/277.5                            | 4237/273.6                                  | -1.4%              |
| 12  | 0.79/91.5                             | 3534/114.7                                  | 25.4%              |
| 13  | 0.41/43.2                             | 2506/32.2                                   | -25.4%             |
| 14  | 0.94/219.6                            | 3776/154.7                                  | -29.5%             |
| 15  | 0.49/53.7                             | 3174/73.5                                   | 36.9%              |
| 16  | 0.27/26.1                             | 2783/45.4                                   | 73.8%              |
| 17  | 1.15/135.9                            | 3593/123.4                                  | -9.2%              |
| 18  | 1.60/192.9                            | 3924/185.8                                  | -3.7%              |
| 19  | 0.83/96.3                             | 2866/50.3                                   | -47.8%             |
| 20  | 1.04/245.1                            | 4078/224.8                                  | -8.3%              |

**Healthy group**

| <b>No.</b> | <b>ELISA<br/>(O.D. / ng·L<sup>-1</sup>)</b> | <b>immuno-NRCA<br/>(a.u. / ng·L<sup>-1</sup>)</b> | <b>relative deviation</b> |
|------------|---------------------------------------------|---------------------------------------------------|---------------------------|
| 1          | 1.17/138.3                                  | 3696/140.2                                        | 1.4%                      |
| 2          | 0.27/26.1                                   | 2773/44.8                                         | 71.6%                     |
| 3          | 0.84/96.9                                   | 3468/105.8                                        | 9.1%                      |
| 4          | 1.08/127.5                                  | 3643/131.3                                        | 3.0%                      |
| 5          | 0.60/67.5                                   | 3317/87.8                                         | 30.0%                     |
| 6          | 0.58/64.8                                   | 3023/61.0                                         | -5.8%                     |
| 7          | 0.40/42.3                                   | 3036/62.0                                         | 46.6%                     |
| 8          | 0.20/17.7                                   | 2579/35.2                                         | 99.1%                     |
| 9          | 0.85/99.3                                   | 3331/89.3                                         | -10.1%                    |
| 10         | 1.37/163.2                                  | 3853/170.2                                        | 4.3%                      |
| 11         | 0.42/44.4                                   | 2833/48.2                                         | 8.7%                      |
| 12         | 0.73/84.3                                   | 3542/115.9                                        | 37.5%                     |
| 13         | 0.20/17.4                                   | 2640/38.0                                         | 118.4%                    |
| 14         | 1.64/197.1                                  | 3987/200.9                                        | 1.9%                      |
| 15         | 0.49/54.3                                   | 3222/78.0                                         | 43.7%                     |
| 16         | 0.28/27.9                                   | 2882/51.3                                         | 83.7%                     |
| 17         | 1.12/132.9                                  | 3894/179.0                                        | 34.7%                     |
| 18         | 1.34/159.6                                  | 3673/136.3                                        | -14.6%                    |
| 19         | 0.79/90.9                                   | 3099/67.0                                         | -26.3%                    |
| 20         | 0.86/99.6                                   | 3096/66.8                                         | -33.0%                    |
